# Supplementary material
Source: publisher figshare collection journal article supplement (https://acs.figshare.com/ndownloader/files/14456348)
Supplement: Supplementary file 1 [file 14456348]

## Supporting information

# One-pot fabrication of g-C<sub>3</sub>N<sub>4</sub>/MWCNTs nanocomposites with superior visible-light photocatalytic performance

*Fei Ding<sup>a, d, ‡</sup>, Zhanfeng Zhao<sup>a, d, ‡</sup>, Dong Yang<sup>b, c</sup>, Xuyang Zhao<sup>a, d</sup>, Yao Chen<sup>a, d</sup> and Zhongyi Jiang<sup>a, d, \*</sup>*

<sup>a</sup> Key Laboratory for Green Technology, School of Chemical Engineering and Technology, Tianjin University, Tianjin 300072, China

<sup>b</sup> Key Laboratory of Systems Bioengineering of Ministry of Education, School of Chemical Engineering and Technology, Tianjin University, Tianjin 30072, China

<sup>c</sup> School of Environmental Science and Engineering, Tianjin University, 300072 Tianjin, China

<sup>d</sup> Collaborative Innovation Center of Chemical Science and Engineering (Tianjin), Tianjin 300072, China

\* Corresponding author. Tel: 86-22-27406646. Fax: 86-22-23500086.

E-mail address: zhyjiang@tju.edu.cn

‡ These authors contributed equally.

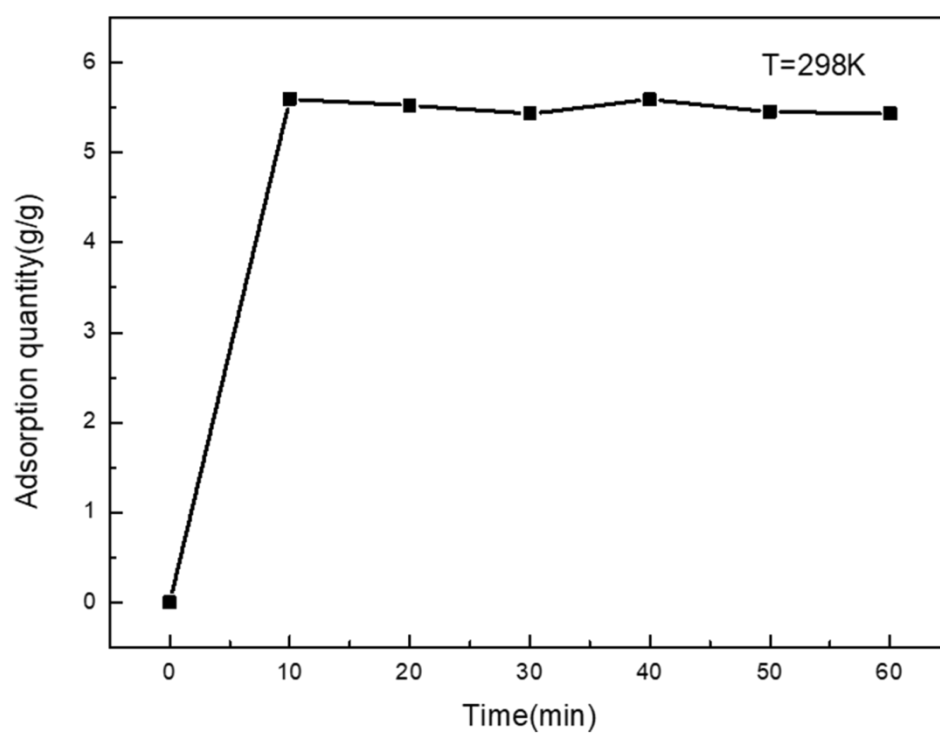

Figure S1. Adsorption isothermal curve of g-C<sub>3</sub>N<sub>4</sub>/MWCNTs-2 for the RhB solution of 10 mg L<sup>-1</sup> at 298 K.

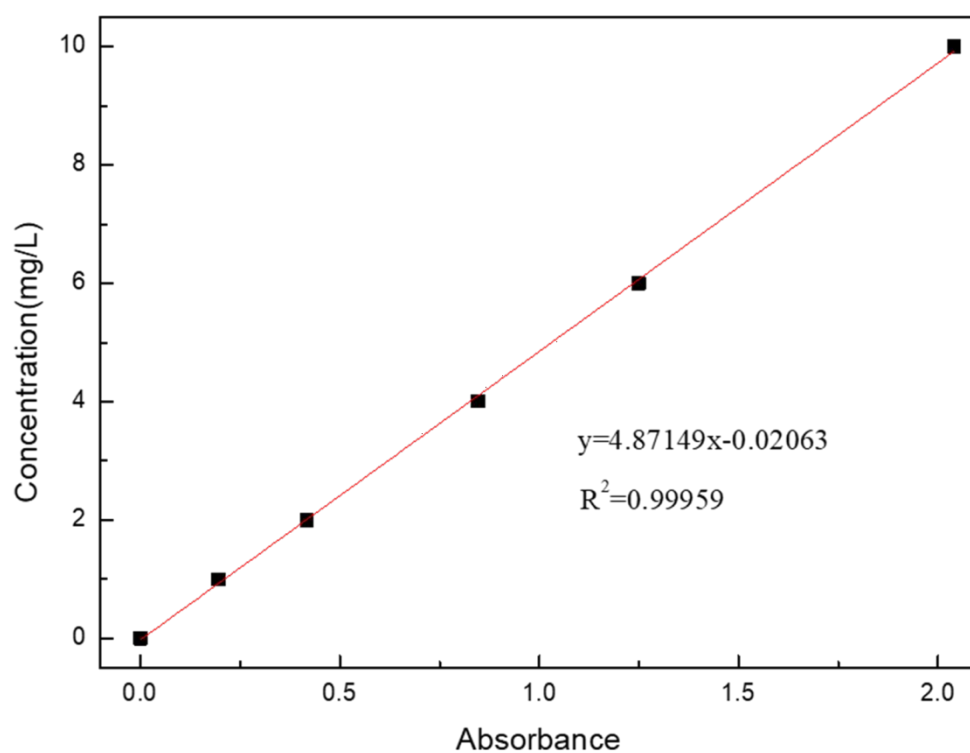

Figure S2. Concentration-adsorption standard curve of RhB solution

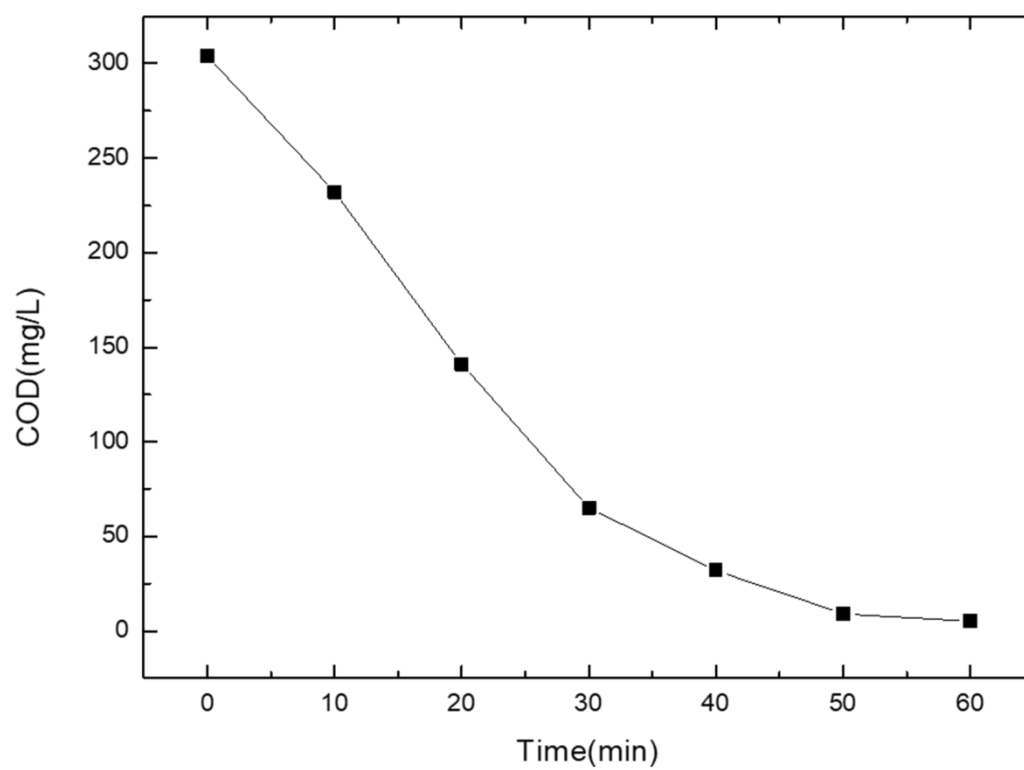

Figure S3. Chemical oxygen demand (COD) for RhB solution in the presence of

g-C<sub>3</sub>N<sub>4</sub>/MWCNTs-2 photocatalyst
